# Supplementary material for: Improved risk stratification in prevention by use of a panel of selected circulating microRNAs
Source: Sci Rep. 2017 Jul 3;7:4511. doi: 10.1038/s41598-017-04040-w (PMC5495799; doi:10.1038/s41598-017-04040-w)
Supplement: Supplementary file 1 — Supplementary dataset [file 41598_2017_4040_MOESM1_ESM.doc]

**Supplementary Information for:**

**Improved risk stratification in prevention**

**by use of a panel of selected circulating microRNAs**

Till Keller, MD*1,2,16; Jes-Niels Boeckel, PhD*1,2,3; Stefan Groß, PhD5,2; Jens Klotsche, PhD4; Lars Palapies, MSc1; David Leistner, MD1,14; Lars Pieper, PhD4; Günnter K Stalla, MD6;

Hendrik Lehnert, MD7; Sigmund Silber, MD8; David Pittrow, MD11; Winfried Maerz, MD9;

Marcus Dörr, MD5,15; Hans-Ulrich Wittchen, MD4; Sebastian E. Baumeister, PhD12,13;

Uwe Völker, PhD10; Stephan B Felix, MD5,15; Stefanie Dimmeler, PhD*2,3; Andreas M Zeiher, MD*1,2

1 Department of Internal Medicine III, Cardiology, University Hospital, Goethe University Frankfurt, Frankfurt, Germany

2 German Center for Cardiovascular Disease (DZHK), Partnersite RheinMain

3 Institute of Cardiovascular Regeneration, Centre for Molecular Medicine, Goethe University Frankfurt, Frankfurt, Germany

4 Klinische Psychologie und Psychotherapie, Technical University Dresden, Dresden, Germany

5 Innere Klinik B, Universitätsmedizin Greifswald, Greifswald, Germany

6 Max­Plank­Institut für Psychiatrie, Neuroendokrinologie, München, München, Germany

7 Medizinische Klinik I, Universitätsklinikum Schleswig­Holstein, Lübeck, Germany

8 Praxisklinik, Kardiologische Gemeinschaftspraxis, München, Germany

9 synlab Akademie für ärztliche Fortbildung, Synlab Services GmbH, Mannheim, Germany

10 Interfakultäres Institut für Genetik & Funktionelle Genomforschung, Universitätsmedizin Greifswald, Greifswald, Germany

11 Institute of Clinical Pharmacology, Technical University Dresden, Dresden, Germany

12 Institute for Community Medicine, University Medicine Greifswald, Germany

13 Institute of Epidemiology and Preventive Medicine, University of Regensburg, Germany

14 German Center for Cardiovascular Disease (DZHK), Partnersite Berlin

15 German Center for Cardiovascular Disease (DZHK), Partnersite Greifswald

16 Department of Cardiology, Kerckhoff Heart and Thorax Centre, Bad Nauheim, Germany

* Authors contributed equally as first and senior authors

| **Derivation Cohort**  **DETECT Study** | | |
| --- | --- | --- |
|  | **Derivation Cohort**  *n=178* | **Total DETECT Cohort**  (only patients without renal failure, CHD anf heart failure)  *n=5691* |
| Female, x/x(%) | 178 / 101 (56.7) | 5,691 / 3,536 (62.1) |
| Age, mean (SD) | 54 (45 - 68) | 56 (45 - 67) |
| CVRF |  |  |
| - Arterial Hypertension, x/x(%) | 178 / 72 (40.5) | 5,691 / 2,026 (35.6) |
| - Dyslipidaemia, x/x(%) | 178 / 57 (32.0) | 5,691 / 1,764 (31.0) |
| - Diabetes mellitus Type 2, x/x(%) | 178 / 27 (15.2) | 5,691 / 810 (14.2) |
| - Obesity (BMI>30), x/x(%) | 175 / 35 (20.0) | 5,617 / 1,300 (23.1) |
| - Active smoker, x/x(%) | 168 / 39 (23.2) | 5,493 / 1,209 (22.0) |
| - Former smoker, x/x(%) | 168 / 43 (25.6) | 5,493 / 1,191 (21.7) |
| - Family history of CVD, x/x(%) | 173 / 27 (15.6) | 5,496 / 825 (15.0) |
| History |  |  |
| - of stroke, x/x(%) | 178 / 0 (0.0) | 5,691 / 74 (1.3) |
| - of myocardial infarction, x/x(%) | 178 / 9 (5.1) | 5,691 / 11 (0.2) |
| - known coronary artery disease, x/x(%) | 178 / 24 (13.5) | 5,691 / 34 (0.6) |
| - known heart failure, x/x(%) | 178 / 23 (12.9) | 5,691 / 121 (2.1) |
| - known PAD, x/x(%) | 178 / 6 (3.4) | 5,691 / 115 (2.0) |
| Laboratory parameters |  |  |
| - NT-proBNP median(IQR) | 71.4 (23.2 - 120.6) | 58.2 (29.2 - 117.6) |
| - CRP, median(IQR) | 2.1 (0.9 - 4.9) | 2.1 (1.0 - 4.5) |
| - eGFRMDRD, median(IQR) | 54.0 (47.4 - 60.3) | 57.6 (50.5 - 64.8) |
| - Troponin I, median(IQR) | 0.011 (0.007 - 0.020) | 0.009 (0.007 - 0.014) |
| - Total cholesterol, median(IQR) | 224 (200 - 256) | 223 (197 - 252) |
| - LDL, median(IQR) | 133 (103 - 154) | 128 (106 - 150) |
| - HDL, median(IQR) | 51 (42 - 64) | 53 (43 - 66) |
| Risk classification |  |  |
| - Framingham Risk Score (FRS), median(IQR) | 6 (2 - 17) | 6 (2 - 17) |

**Supplementary Table 1:** Baseline characteristics of the derivation cohort based on the DETECT study in comparison to the overall DETECT study cohort of patients without prevalent renal or cardiac disease

| **A - DETECT Study cohort** | | **miR-34a** | **miR-223** | **miR-378** | **miR-499** | **miR-133** |
| --- | --- | --- | --- | --- | --- | --- |
| Total cholesterol | Corr.coef. | 0.06 | 0.07 | 0.02 | 0.06 | 0.07 |
|  | p-value | 0.420 | 0.333 | 0.812 | 0.375 | 0.353 |
| eGFRMDRD | Corr.coef. | 0.01 | 0.00 | 0.09 | 0.01 | -0.05 |
|  | p-value | 0.927 | 0.967 | 0.218 | 0.850 | 0.511 |
| CRP | Corr.coef. | -0.01 | 0.07 | 0.22 | 0.03 | 0.14 |
|  | p-value | 0.916 | 0.351 | 0.002 | 0.730 | 0.048 |

| **B - SHIP Study cohort** | | **miR-34a** | **miR-223** | **miR-378** | **miR-499** | **miR-133** |
| --- | --- | --- | --- | --- | --- | --- |
| Total cholesterol | Corr.coef. | - 0.080 | 0.020 | 0.044 | - 0.072 | - 0.024 |
|  | p-value | 0.37 | 0.82 | 0.62 | 0.42 | 0.78 |
| eGFRMDRD | Corr.coef. | 0.027 | 0.12 | 0.058 | 0.13 | 0.063 |
|  | p-value | 0.76 | 0.19 | 0.51 | 0.14 | 0.48 |
| CRP | Corr.coef. | 0.10 | 0.10 | 0.16 | - 0.20 | 0.000 |
|  | p-value | 0.24 | 0.26 | 0.08 | *0.03* | 1 |

**Supplementary Table 2:** Correlation of the evaluated miRs with potential confounders in the derivation cohort (DETECT Study cohort) (A) and in the validation cohort (SHIP Study cohort) (B)

|  |  | **Hazard Ratio**  **Per SD increase** | **95% Confidence Interval** | **p-value** |
| --- | --- | --- | --- | --- |
| **Mortality and/or cardiovascular events**  n=21 events and n=157 controls | | | | |
| miR-34a | Unadjusted | 1.10 | 0.75 ; 1.62 | 0.622 |
|  | Adj. for age, sex and NT-proBNP | 1.37 | 0.94 ; 1.99 | 0.101 |
|  | Adj. for age, sex and Troponin I | 1.21 | 0.85 ; 1.72 | 0.298 |
|  | Adj. for age, sex and CRP | 1.20 | 0.83 ; 1.73 | 0.340 |
| miR-223 | Unadjusted | 0.45 | 0.11 ; 1.80 | 0.257 |
|  | Adj. for age, sex and NT-proBNP | 0.83 | 0.64 ; 1.08 | 0.168 |
|  | Adj. for age, sex and Troponin I | **0.72** | 0.57 ; 0.91 | *0.007* |
|  | Adj. for age, sex and CRP | 0.71 | 0.32 ; 1.57 | 0.398 |
| miR-378 | Unadjusted | 0.55 | 0.04 ; 6.99 | 0.643 |
|  | Adj. for age, sex and NT-proBNP | 0.75 | 0.53 ; 1.05 | 0.094 |
|  | Adj. for age, sex and Troponin I | **0.66** | 0.50 ; 0.86 | *0.002* |
|  | Adj. for age, sex and CRP | 0.45 | 0.02 ; 9.13 | 0.600 |
| miR-499 | Unadjusted | 0.82 | 0.50 ; 1.33 | 0.418 |
|  | Adj. for age, sex and NT-proBNP | 1.08 | 0.76 ; 1.52 | 0.674 |
|  | Adj. for age, sex and Troponin I | 1.07 | 0.75 ; 1.53 | 0.719 |
|  | Adj. for age, sex and CRP | 1.09 | 0.77 ; 1.54 | 0.629 |
| miR-133 | Unadjusted | 0.96 | 0.51 ; 1.79 | 0.886 |
|  | Adj. for age, sex and NT-proBNP | 0.99 | 0.58 ; 1.68 | 0.974 |
|  | Adj. for age, sex and Troponin I | 0.84 | 0.30 ; 2.33 | 0.740 |
|  | Adj. for age, sex and CRP | 0.97 | 0.53 ; 1.78 | 0.928 |
| 5 miR-Panel | Unadjusted | 2.57 | 0.77 ; 8.57 | 0.125 |
|  | Adj. for age, sex and NT-proBNP | 1.56 | 0.47 ; 5.21 | 0.471 |
|  | Adj. for age, sex and Troponin I | 2.13 | 0.79 ; 5.75 | 0.136 |
|  | Adj. for age, sex and CRP | 1.80 | 0.64 ; 5.06 | 0.262 |
| miR-Panel | Unadjusted | 2.57 | 0.77 ; 8.57 | 0.125 |
| **Overall Mortality**  n=12 events and n=166 controls | | | | |
| miR-34a | Unadjusted | 1.10 | 0.69 ; 1.77 | 0.678 |
|  | Adj. for age, sex and NT-proBNP | 1.43 | 0.96 ; 2.13 | 0.078 |
|  | Adj. for age, sex and Troponin I | 1.20 | 0.82 ; 1.75 | 0.357 |
|  | Adj. for age, sex and CRP | 1.19 | 0.82 ; 1.74 | 0.363 |
| miR-223 | Unadjusted | 0.30 | 0.08 ; 1.07 | 0.063 |
|  | Adj. for age, sex and NT-proBNP | 0.80 | 0.61 ; 1.06 | 0.118 |
|  | Adj. for age, sex and Troponin I | 0.80 | 0.56 ; 1.14 | 0.213 |
|  | Adj. for age, sex and CRP | 0.84 | 0.58 ; 1.23 | 0.373 |
| miR-378 | Unadjusted | 0.24 | 0.01 ; 4.14 | 0.327 |
|  | Adj. for age, sex and NT-proBNP | 0.74 | 0.52 ; 1.06 | 0.096 |
|  | Adj. for age, sex and Troponin I | 0.73 | 0.46 ; 1.16 | 0.185 |
|  | Adj. for age, sex and CRP | 0.78 | 0.51 ; 1.19 | 0.252 |
| miR-499 | Unadjusted | 0.88 | 0.48 ; 1.59 | 0.668 |
|  | Adj. for age, sex and NT-proBNP | 1.28 | 0.87 ; 1.90 | 0.215 |
|  | Adj. for age, sex and Troponin I | 1.25 | 0.84 ; 1.86 | 0.261 |
|  | Adj. for age, sex and CRP | 1.25 | 0.84 ; 1.85 | 0.267 |
| miR-133 | Unadjusted | **0.09** | 0.01 ; 0.86 | *0.037* |
|  | Adj. for age, sex and NT-proBNP | **0.20** | 0.05 ; 0.76 | *0.018* |
|  | Adj. for age, sex and Troponin I | **0.15** | 0.03 ; 0.81 | *0.027* |
|  | Adj. for age, sex and CRP | 0.14 | 0.02 ; 1.15 | 0.068 |
| 5 miR-Panel | Unadjusted | **3.03** | 1.09 ; 8.43 | *0.034* |
|  | Adj. for age, sex and NT-proBNP | **2.10** | 1.09 ; 4.05 | *0.026* |
|  | Adj. for age, sex and Troponin I | **2.19** | 1.10 ; 4.38 | *0.026* |
|  | Adj. for age, sex and CRP | 2.19 | 0.99 ; 4.82 | 0.052 |
|  |  |  |  |  |

**Supplementary Table 3:** Prognostic information of the 5 miRs individually and the respective 5 miR Panel in the derivation cohort (DETECT Study cohort) with adjustment for established biomarkers as potential confounders.

|  |  | **Hazard Ratio** | **95% Confidence Interval** | **p-value** |
| --- | --- | --- | --- | --- |
| **Mortality**  n=64 events and n=65 controls | | | | |
| 5 miR-Panel | Adjusted for age and sex | 1.32 | 1.04 – 1.68 | *0.02* |
|  | Adjusted for Framingham Risk Score variables | 1.31 | 1.03 – 1.66 | *0.03* |
| **Cardiovascular events**  n=43 events and n=86 controls | | | | |
| 5 miR-Panel | Adjusted for age and sex | 1.33 | 1.00 – 1.77 | *0.05* |
|  | Adjusted for Framingham Risk Score variables | 1.29 | 0.99 – 1.69 | *0.06* |
|  |  |  |  |  |

**Supplementary table 4:** Prognostic information of the 5 miR Panel in the validation cohort (SHIP Study) after dichotomization according to an individually optimized threshold obtained by maximizing the Youden index in receiver operator characteristics analyses.

|  |  | **Hazard Ratio**  **Per SD increase** | **95% Confidence Interval** | **p-value** |
| --- | --- | --- | --- | --- |
| **Mortality**  n=64 events and n=65 controls | | | | |
| miR-34a | Adj. for age and sex | 1.07 | 0.85 - 1.35 | 0.56 |
|  | Adj. for age, sex and FRS variables | 1.07 | 0.84 - 1.38 | 0.57 |
| miR-223 | Adj. for age and sex | 1.00 | 0.77 - 1.28 | 0.98 |
|  | Adj. for age, sex and FRS variables | 0.99 | 0.76 - 1.27 | 0.91 |
| miR-378 | Adj. for age and sex | 1.12 | 0.90 - 1.39 | 0.32 |
|  | Adj. for age, sex and FRS variables | 1.09 | 0.88 - 1.36 | 0.41 |
| miR-499 | Adj. for age and sex | 0.98 | 0.77 - 1.24 | 0.84 |
|  | Adj. for age, sex and FRS variables | 0.98 | 0.77 - 1.24 | 0.84 |
| miR-133 | Adj. for age and sex | 1.15 | 0.92 - 1.39 | 0.24 |
|  | Adj. for age, sex and FRS variables | 1.15 | 0.94 - 1.41 | 0.19 |
| **Cardiovascular events**  n=43 events and n=86 controls | | | | |
| miR-34a | Adj. for age and sex | 1.06 | 0.80 - 1.40 | 0.69 |
|  | Adj. for age, sex and FRS variables | 1.05 | 0.78 - 1.41 | 0.75 |
| miR-223 | Adj. for age and sex | 1.02 | 0.75 - 1.37 | 0.92 |
|  | Adj. for age, sex and FRS variables | 0.99 | 0.73 - 1.35 | 0.95 |
| miR-378 | Adj. for age and sex | 1.14 | 0.87 - 1.49 | 0.35 |
|  | Adj. for age, sex and FRS variables | 1.12 | 0.86 - 1.47 | 0.41 |
| miR-499 | Adj. for age and sex | 0.98 | 0.73 - 1.31 | 0.88 |
|  | Adj. for age, sex and FRS variables | 0.99 | 0.73 - 1.33 | 0.93 |
| miR-133 | Adj. for age and sex | 1.16 | 0.91 - 1.48 | 0.22 |
|  | Adj. for age, sex and FRS variables | 1.15 | 0.90 - 1.47 | 0.27 |
|  |  |  |  |  |

**Supplementary Table 5:** Prognostic value of the 5 individual miRs in the validation cohort

|  |  | **Hazard Ratio**  **per SD increase** | **95% Confidence Interval** | **p-value** |
| --- | --- | --- | --- | --- |
| **Mortality**  n=64 events and n=65 controls | | | | |
| 5 miR-Panel |  | 1.32 | 1.04 - 1.68 | *0.02* |
| 4 miR Panel 1 | mir223, mir378, mir499, mir133a | 1.33 | 1.05 - 1.68 | *0.02* |
| 4 miR Panel 2 | mir34a, mir378, mir499, mir133a | 1.13 | 0.89 - 1.43 | 0.32 |
| 4 miR Panel 3 | mir34a, mir223, mir499, mir133a | 1.23 | 1.00 - 1.53 | 0.05 |
| 4 miR Panel 4 | mir34a, mir223, mir378, mir133a | 1.30 | 1.03 - 1.66 | *0.03* |
| 4 miR Panel 5 | mir34a, mir223, mir378, mir499 | 1.16 | 0.90 - 1.49 | 0.26 |
| **Cardiovascular events**  n=43 events and n=86 controls | | | | |
| 5 miR-Panel |  | 1.33 | 1.00 - 1.77 | 0.05 |
| 4 miR Panel 1 | mir223, mir378, mir499, mir133a | 1.34 | 1.02 - 1.76 | 0.04 |
| 4 miR Panel 2 | mir34a, mir378, mir499, mir133a | 1.17 | 0.88 - 1.54 | 0.28 |
| 4 miR Panel 3 | mir34a, mir223, mir499, mir133a | 1.23 | 0.97 - 1.56 | 0.09 |
| 4 miR Panel 4 | mir34a, mir223, mir378, mir133a | 1.32 | 0.99 - 1.76 | 0.06 |
| 4 miR Panel 5 | mir34a, mir223, mir378, mir499 | 1.17 | 0.87 - 1.58 | 0.30 |
|  |  |  |  |  |

**Supplementary Table 6:** Sensitivity Analysis of the Prognostic value of the miR Panel in the validation study cohort (SHIP) by calculating the Hazard Ratios for all possible 4 miR marker combinations. All Hazard ratios are adjusted for age and sex.
